# Supplementary material
Source: PubMed Central journal article supplement (PMC1599902)

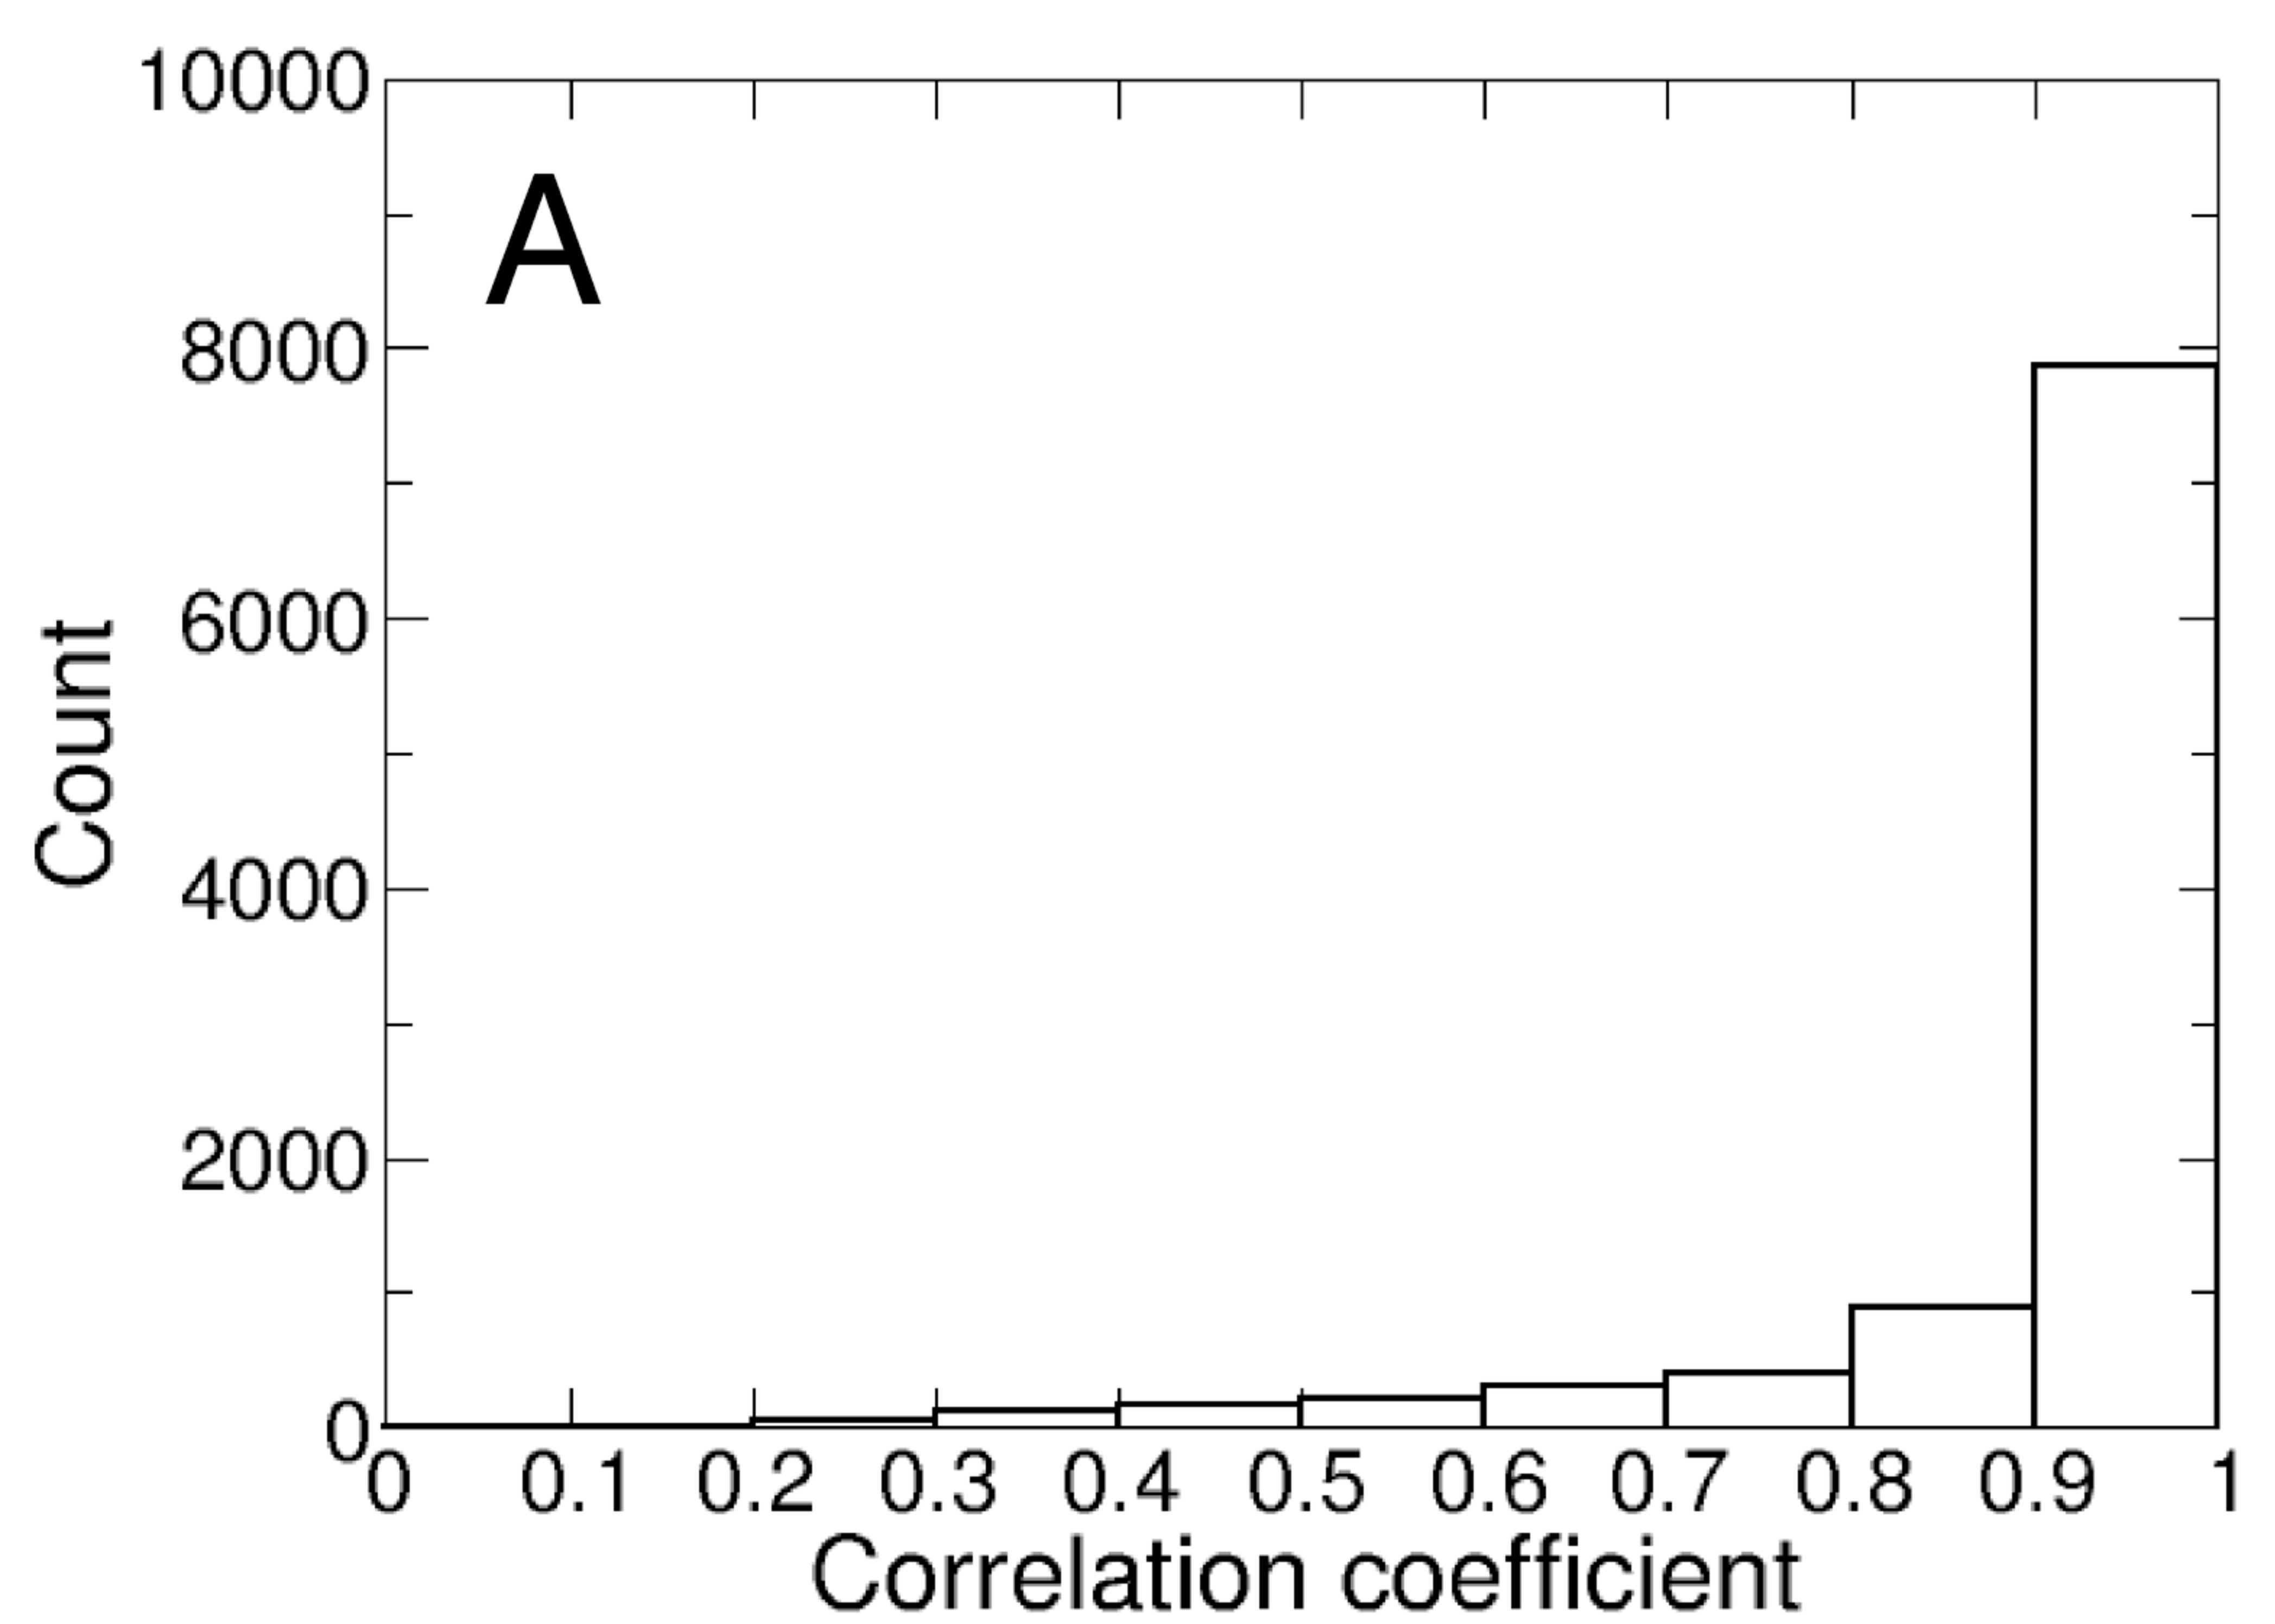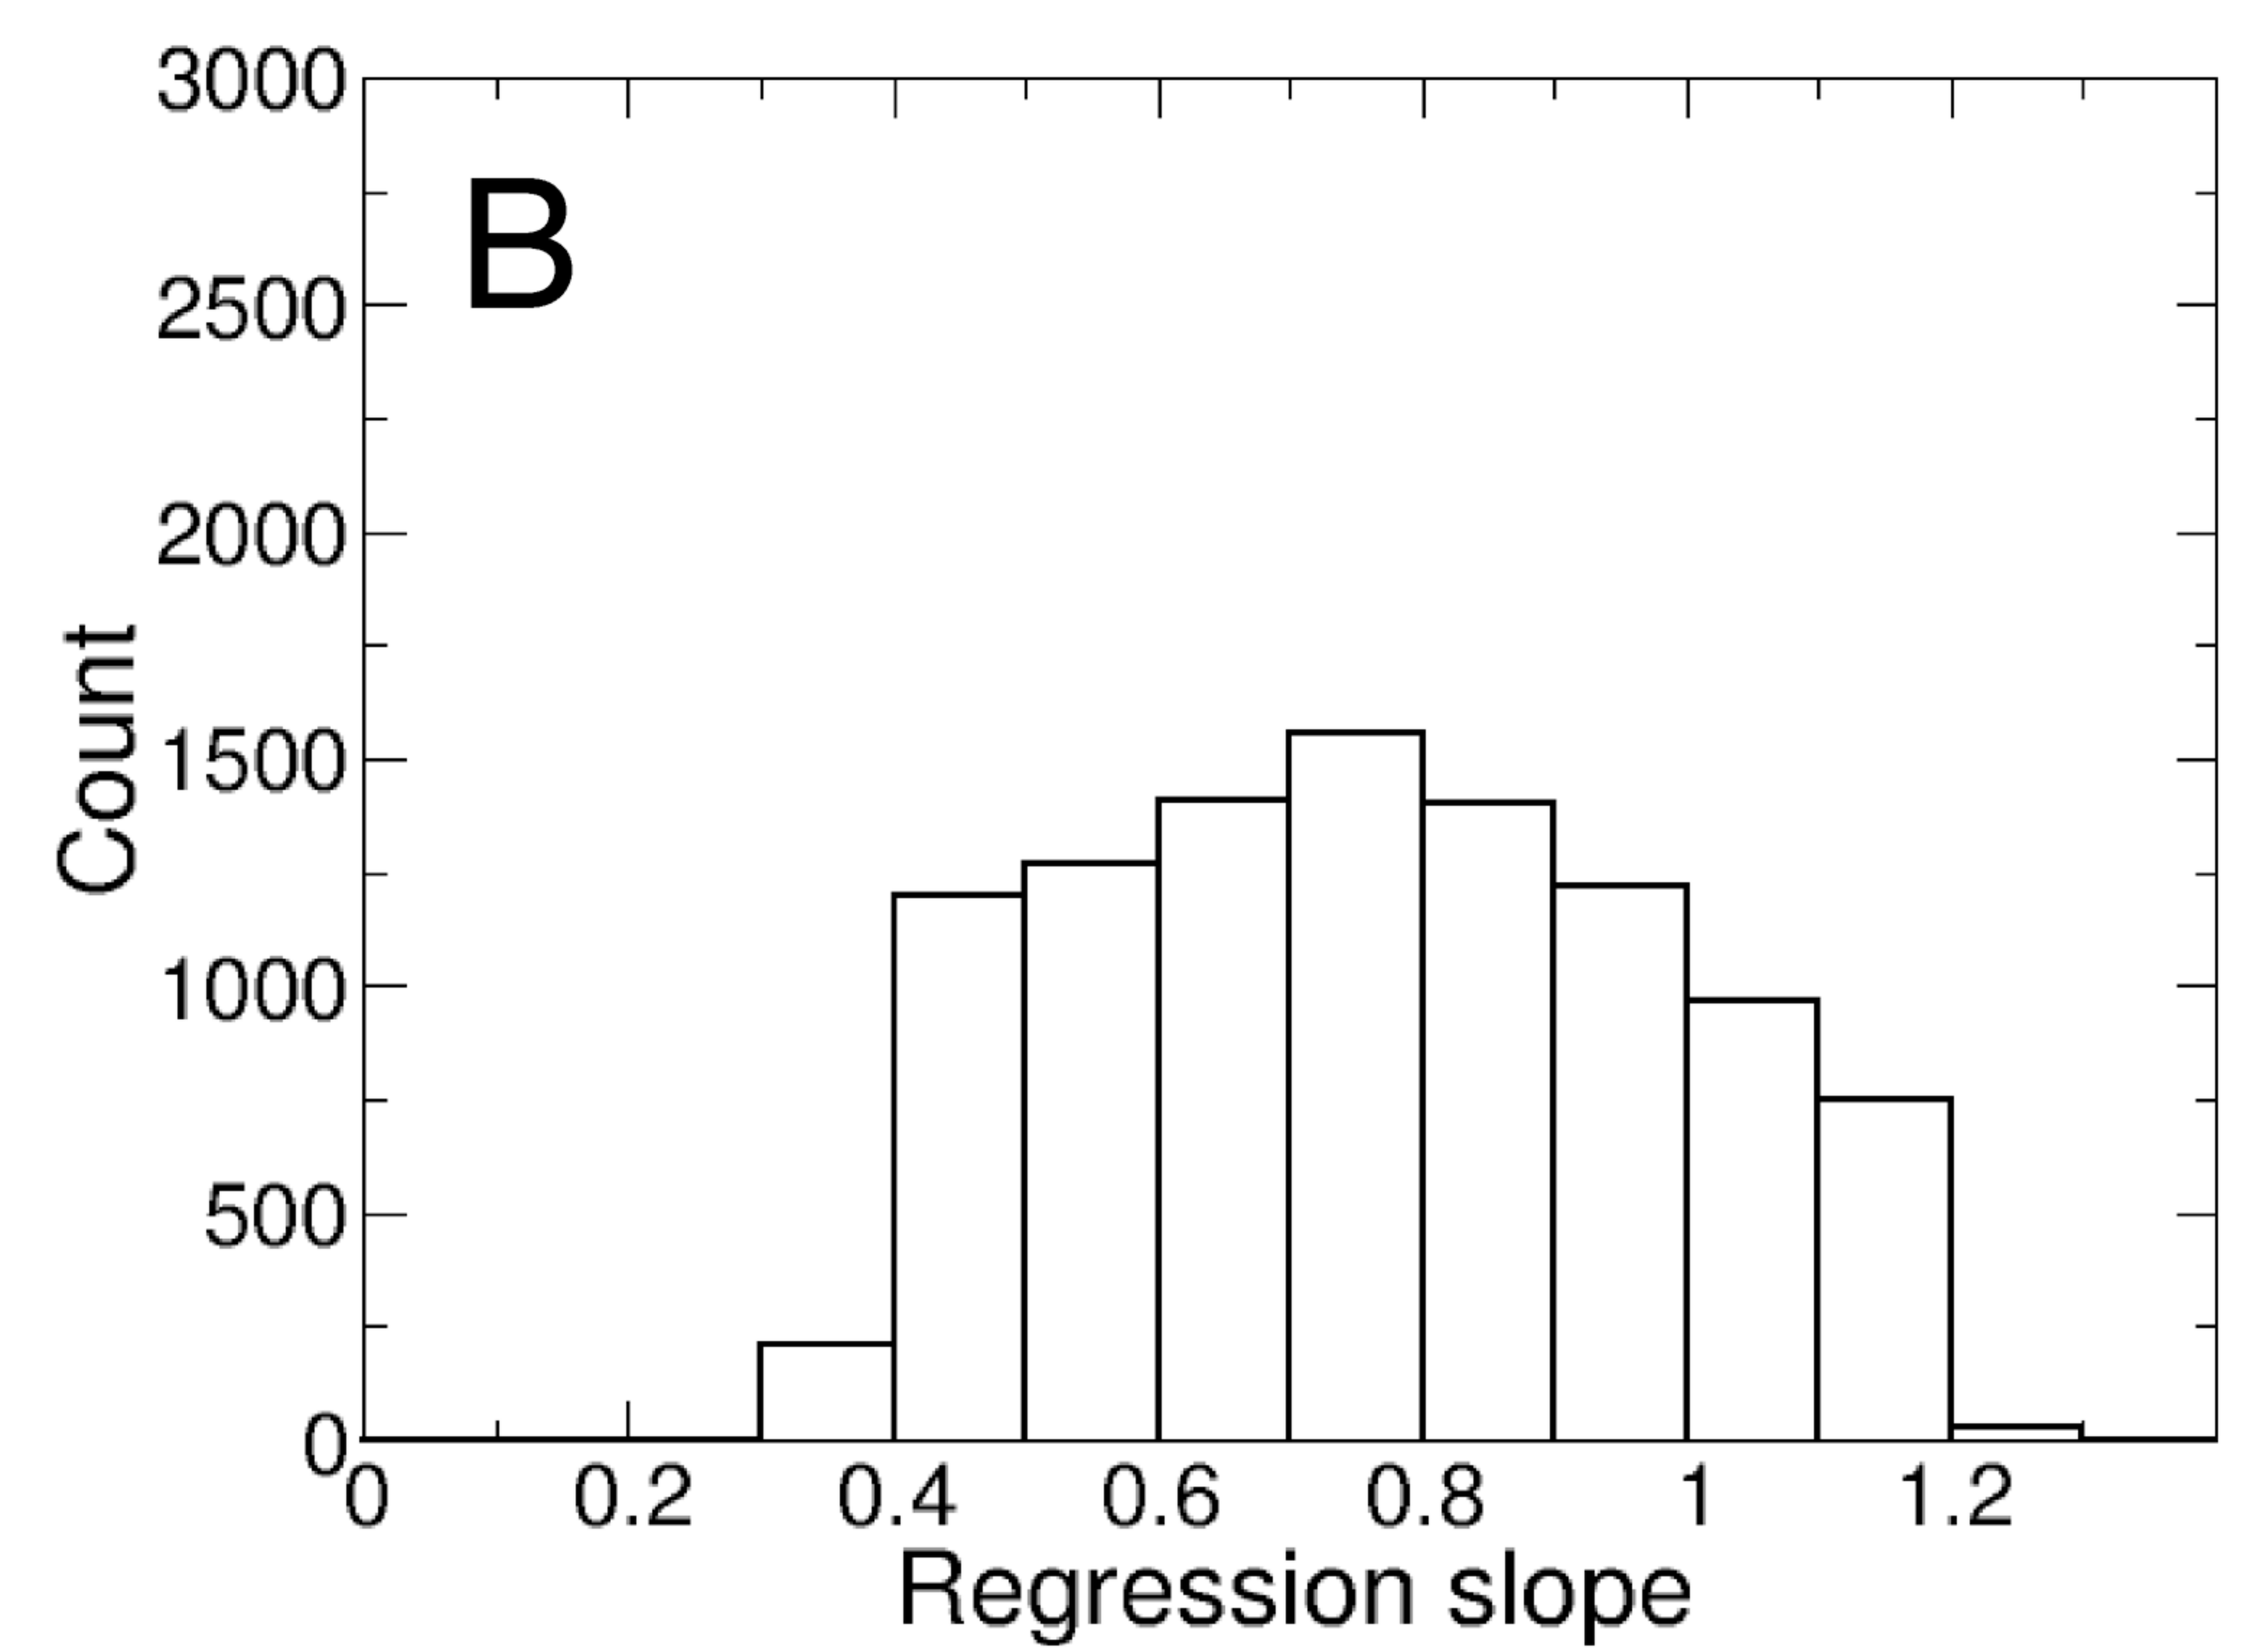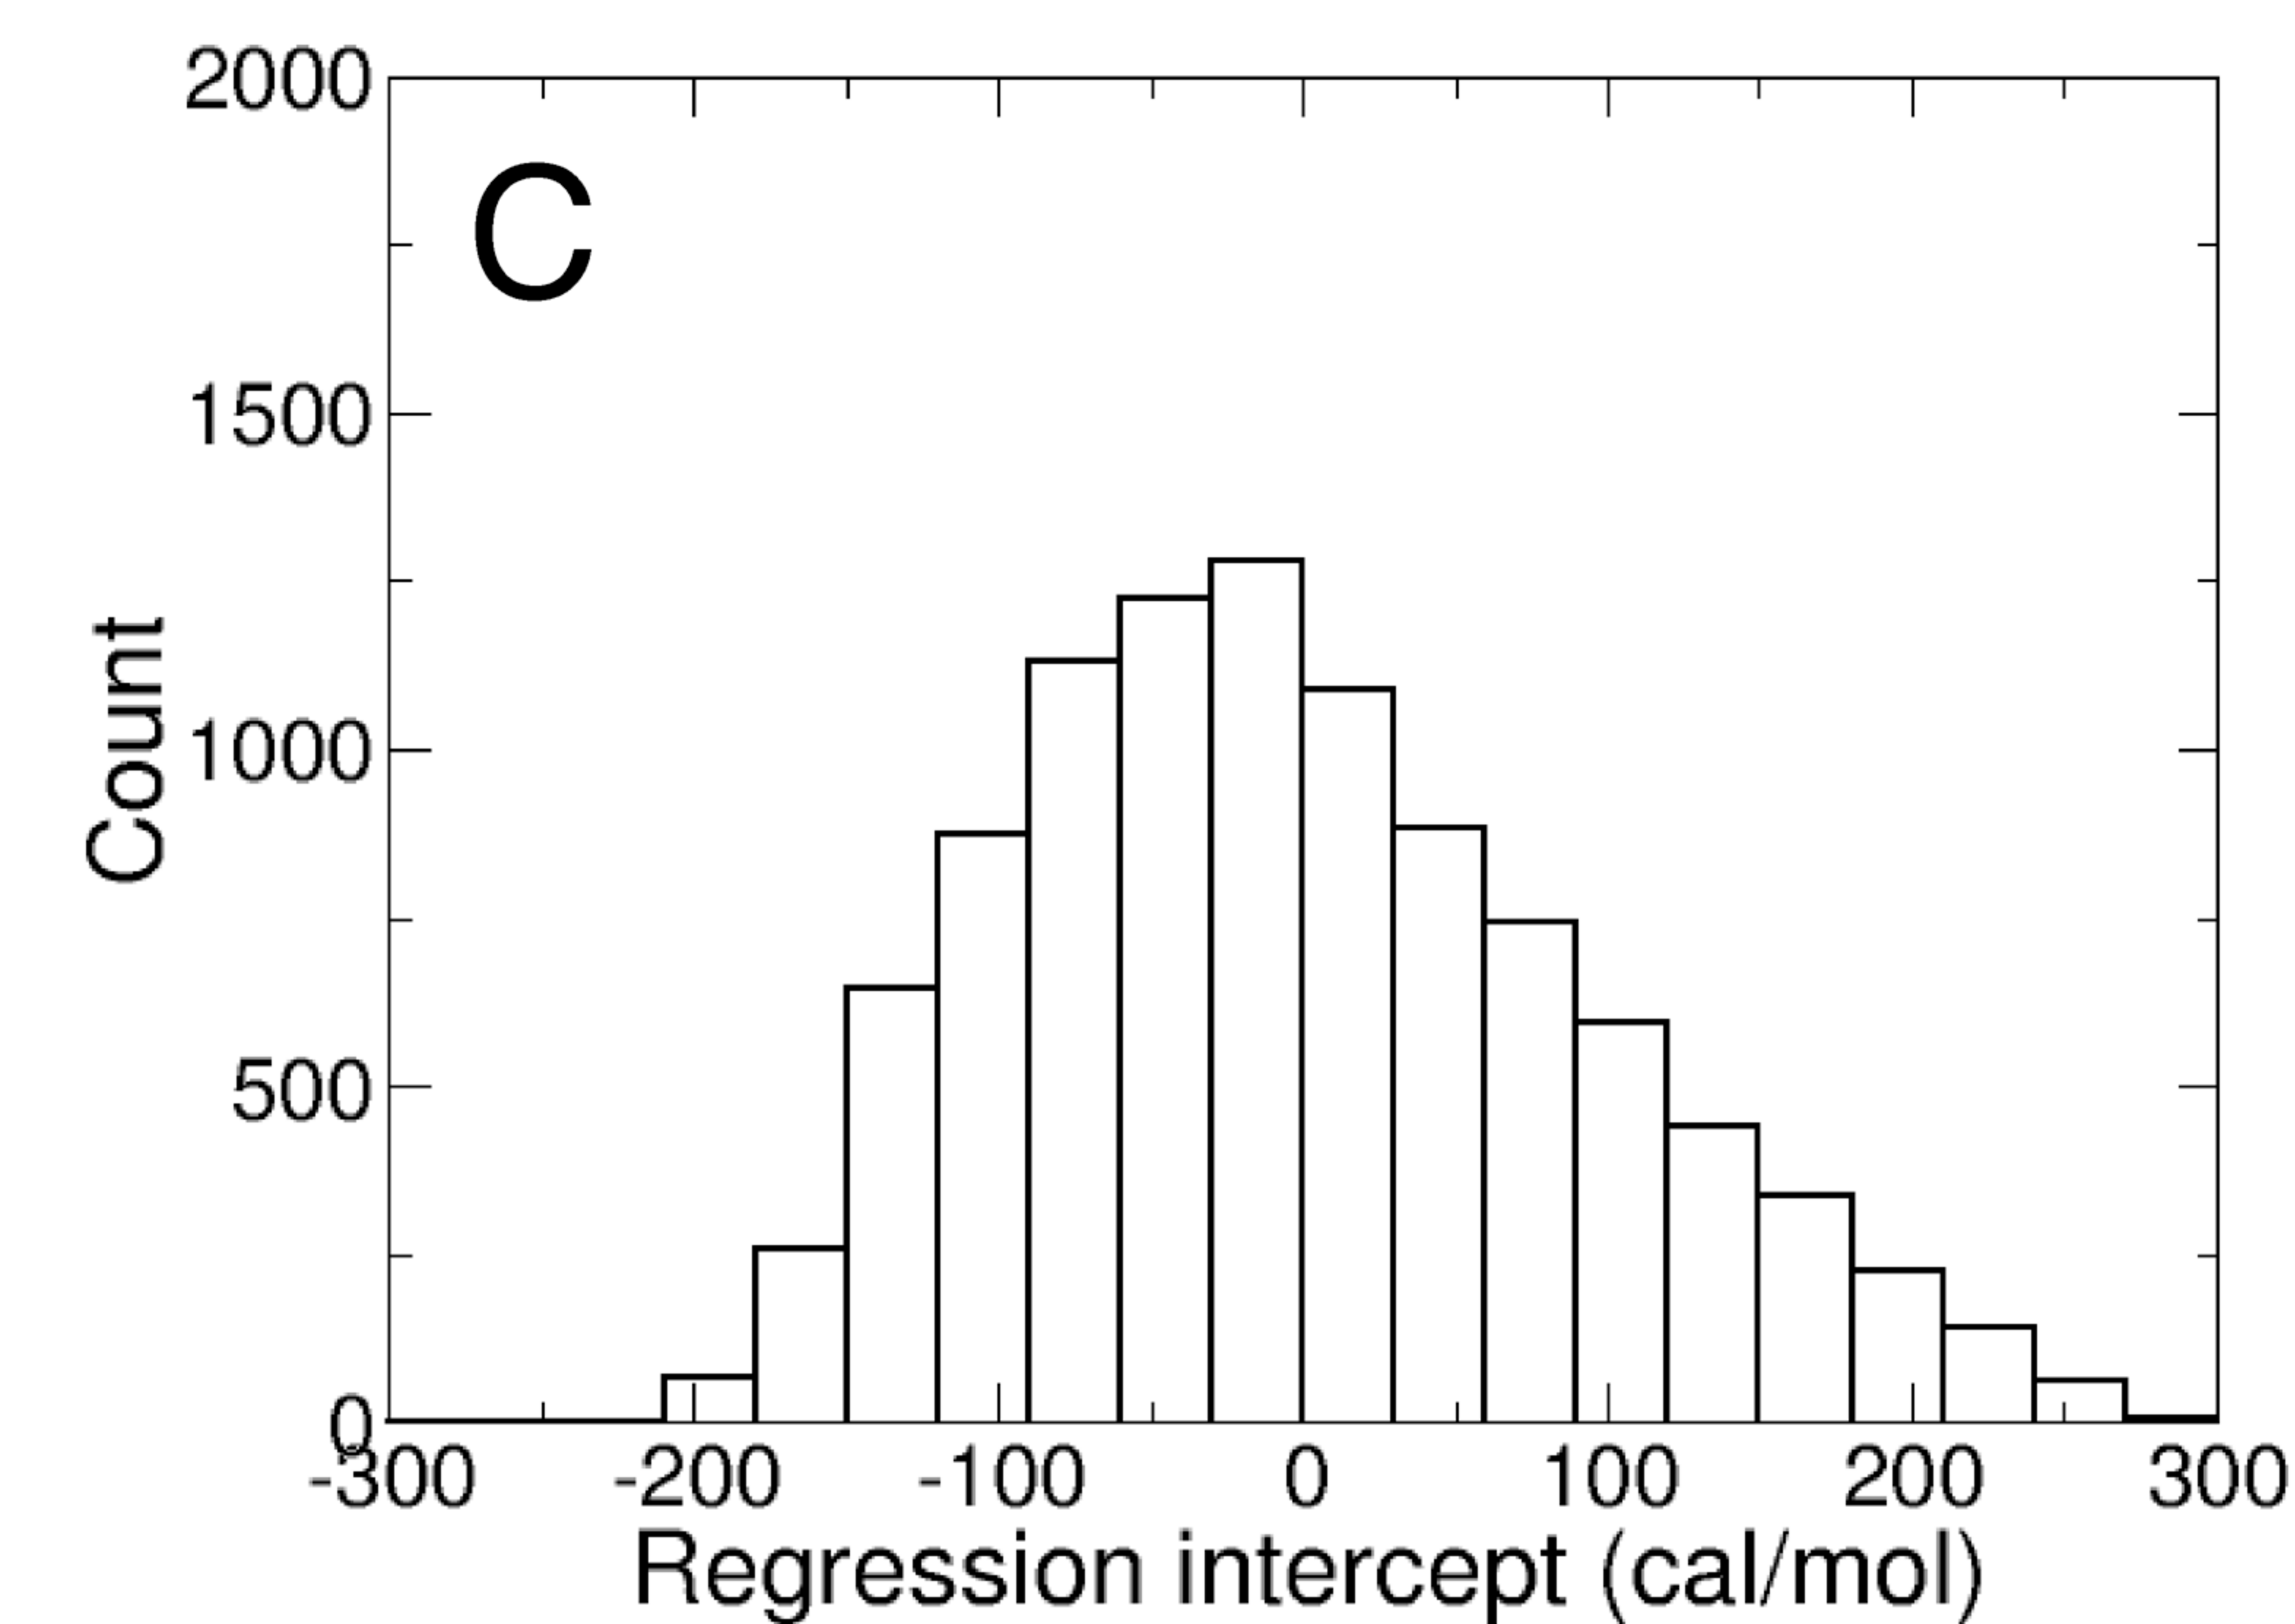

Supplement: pnas_0606236103_1.pdf [file pnas_0606236103_1.pdf]

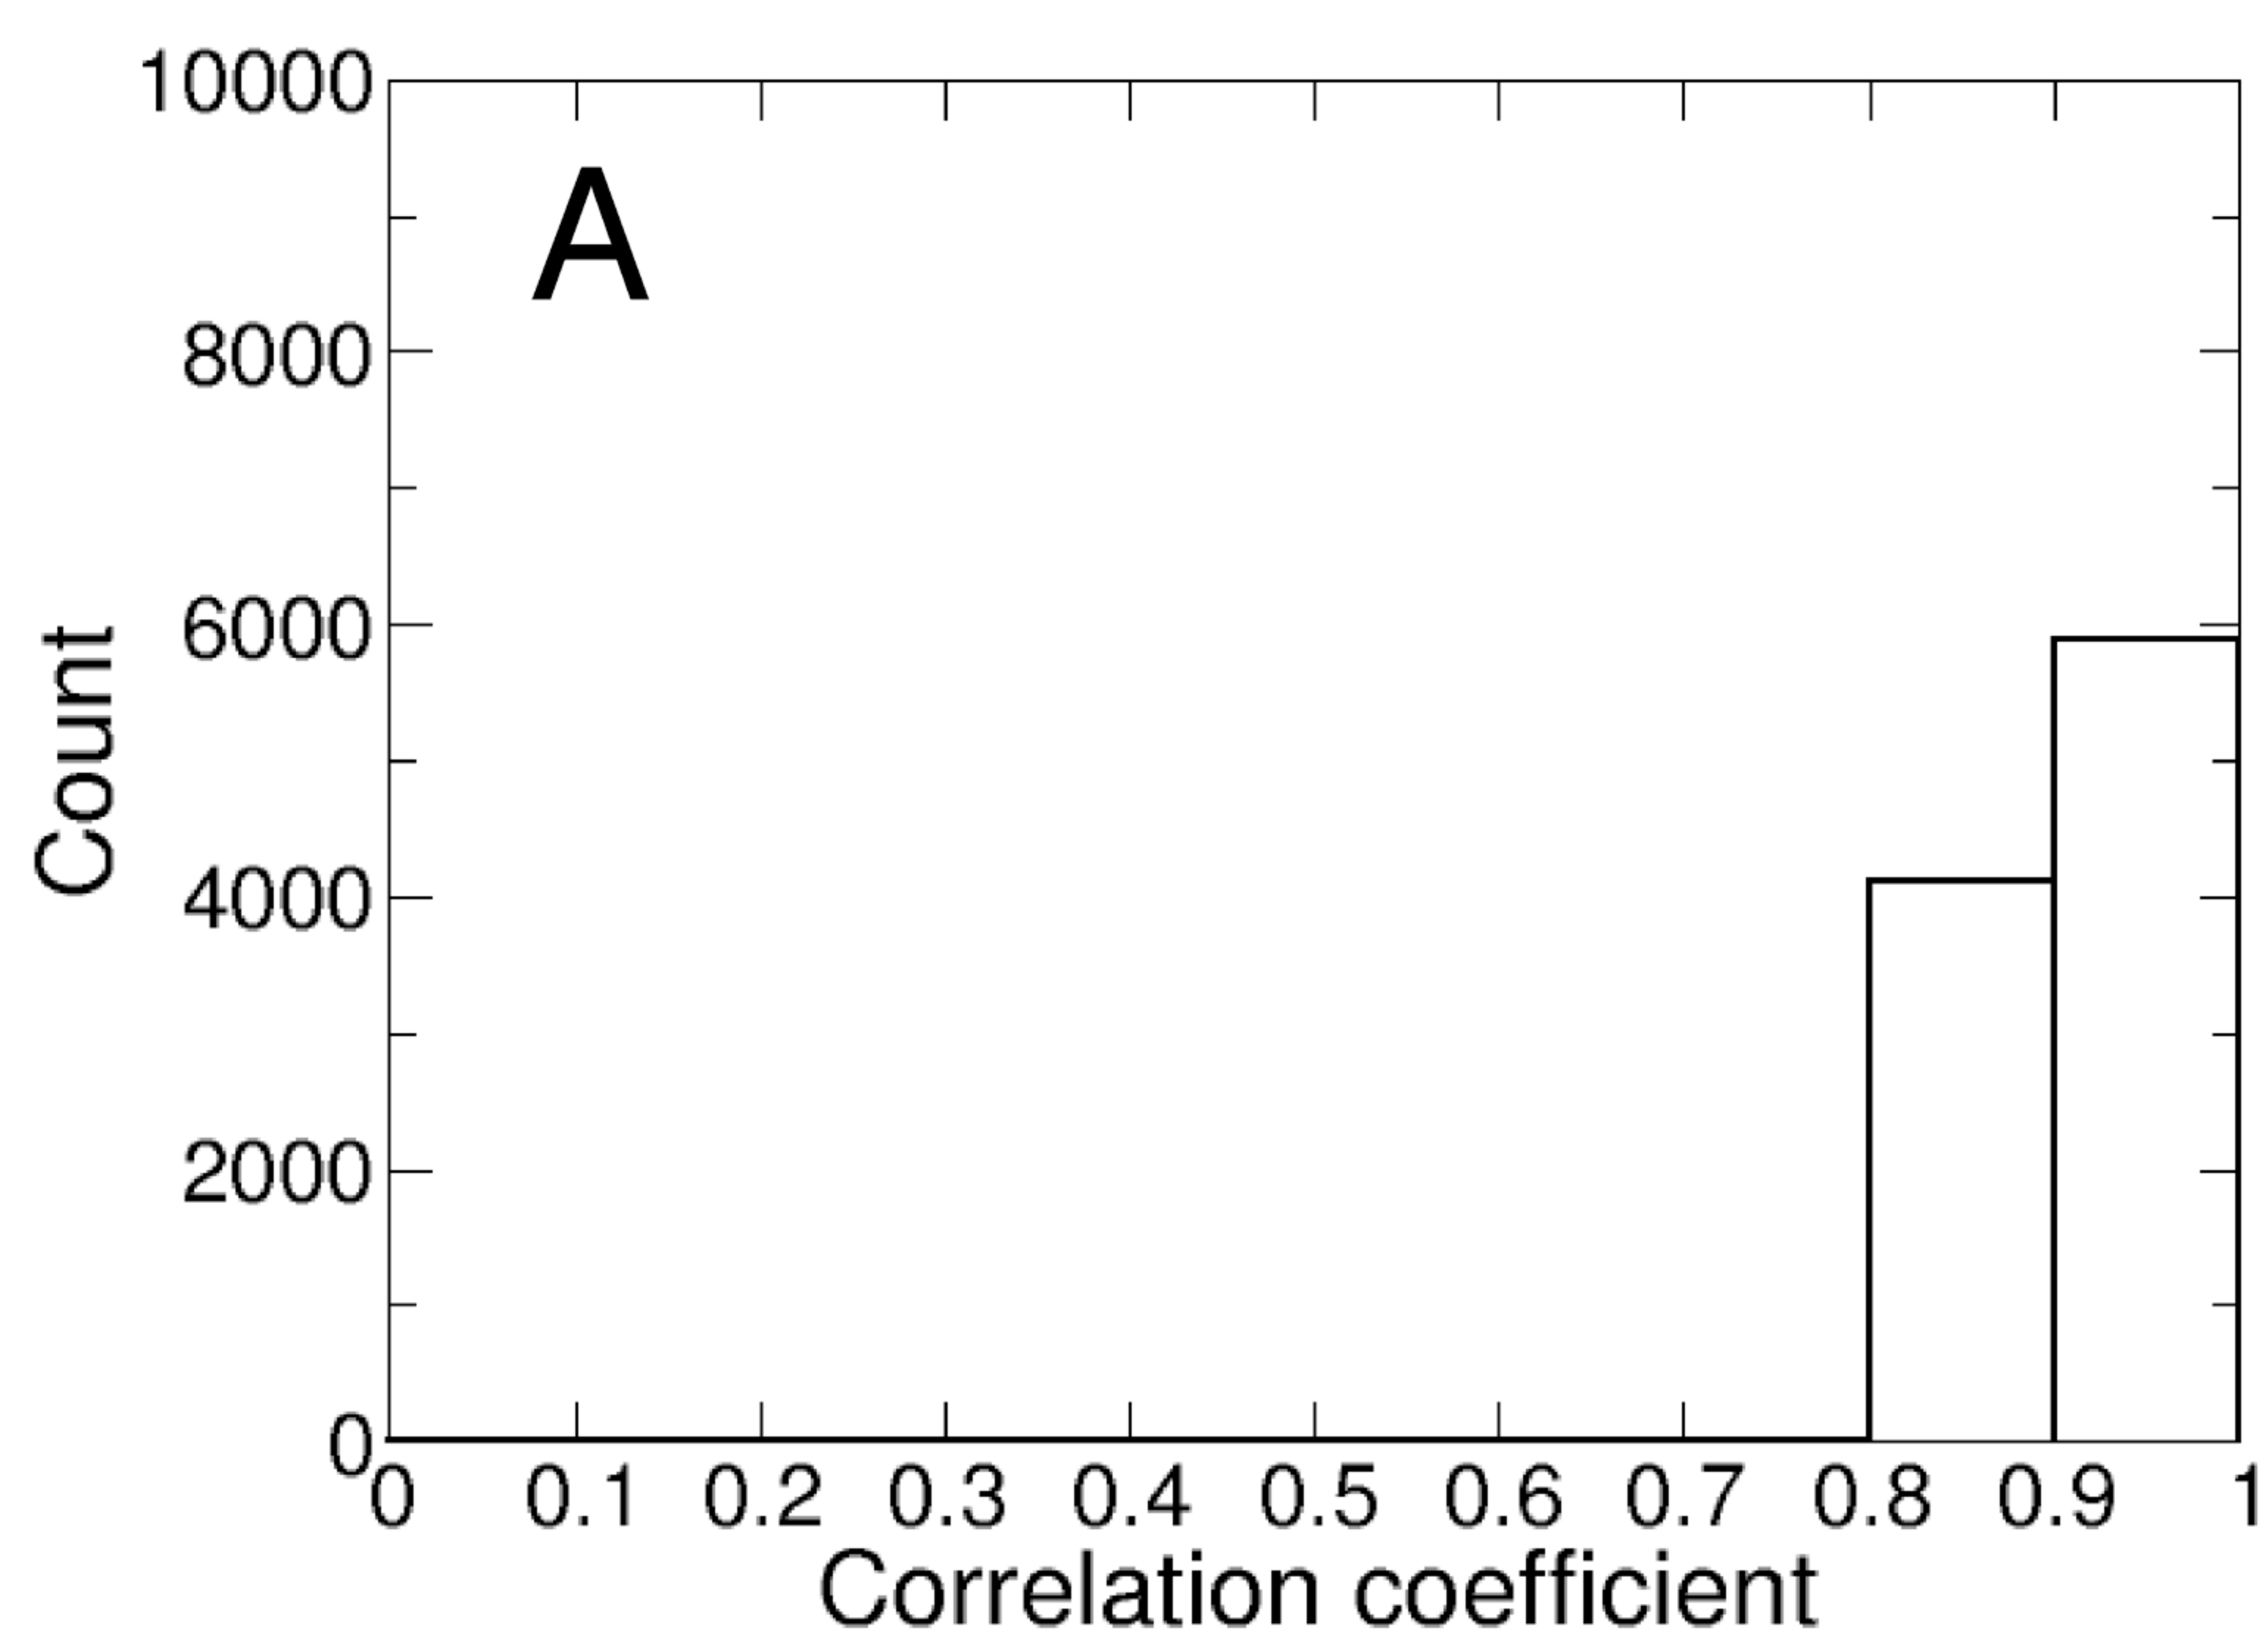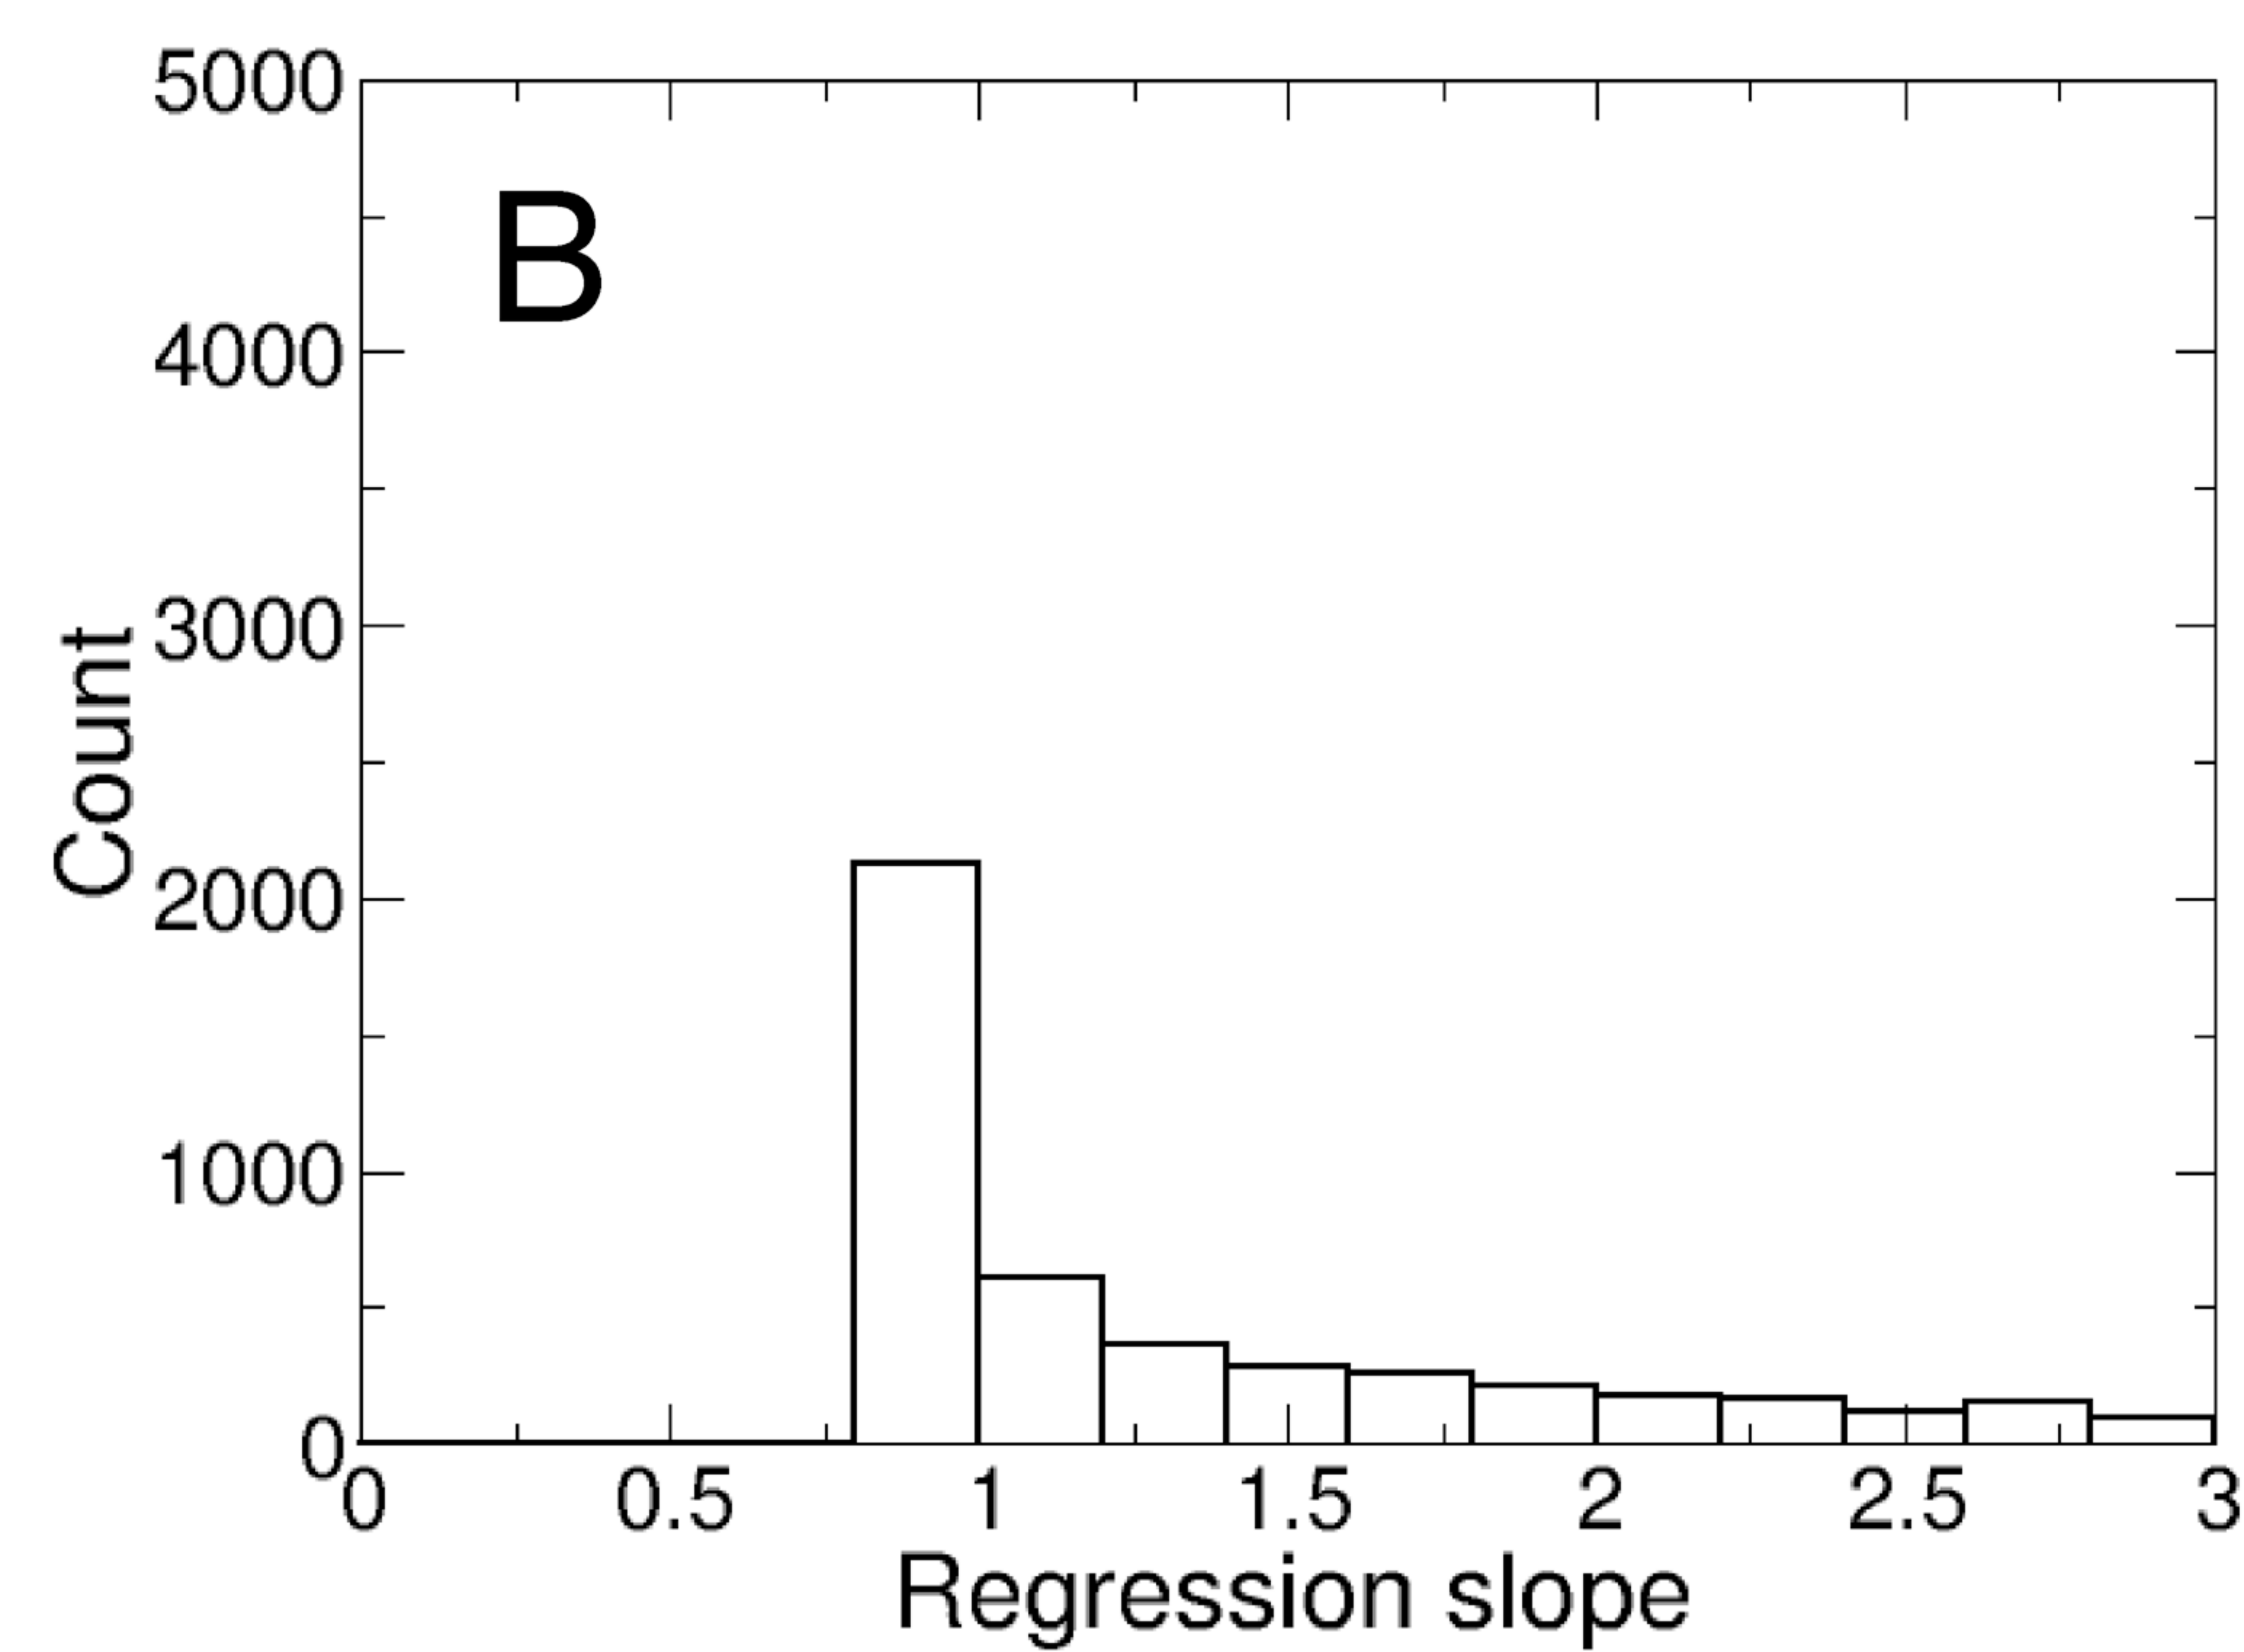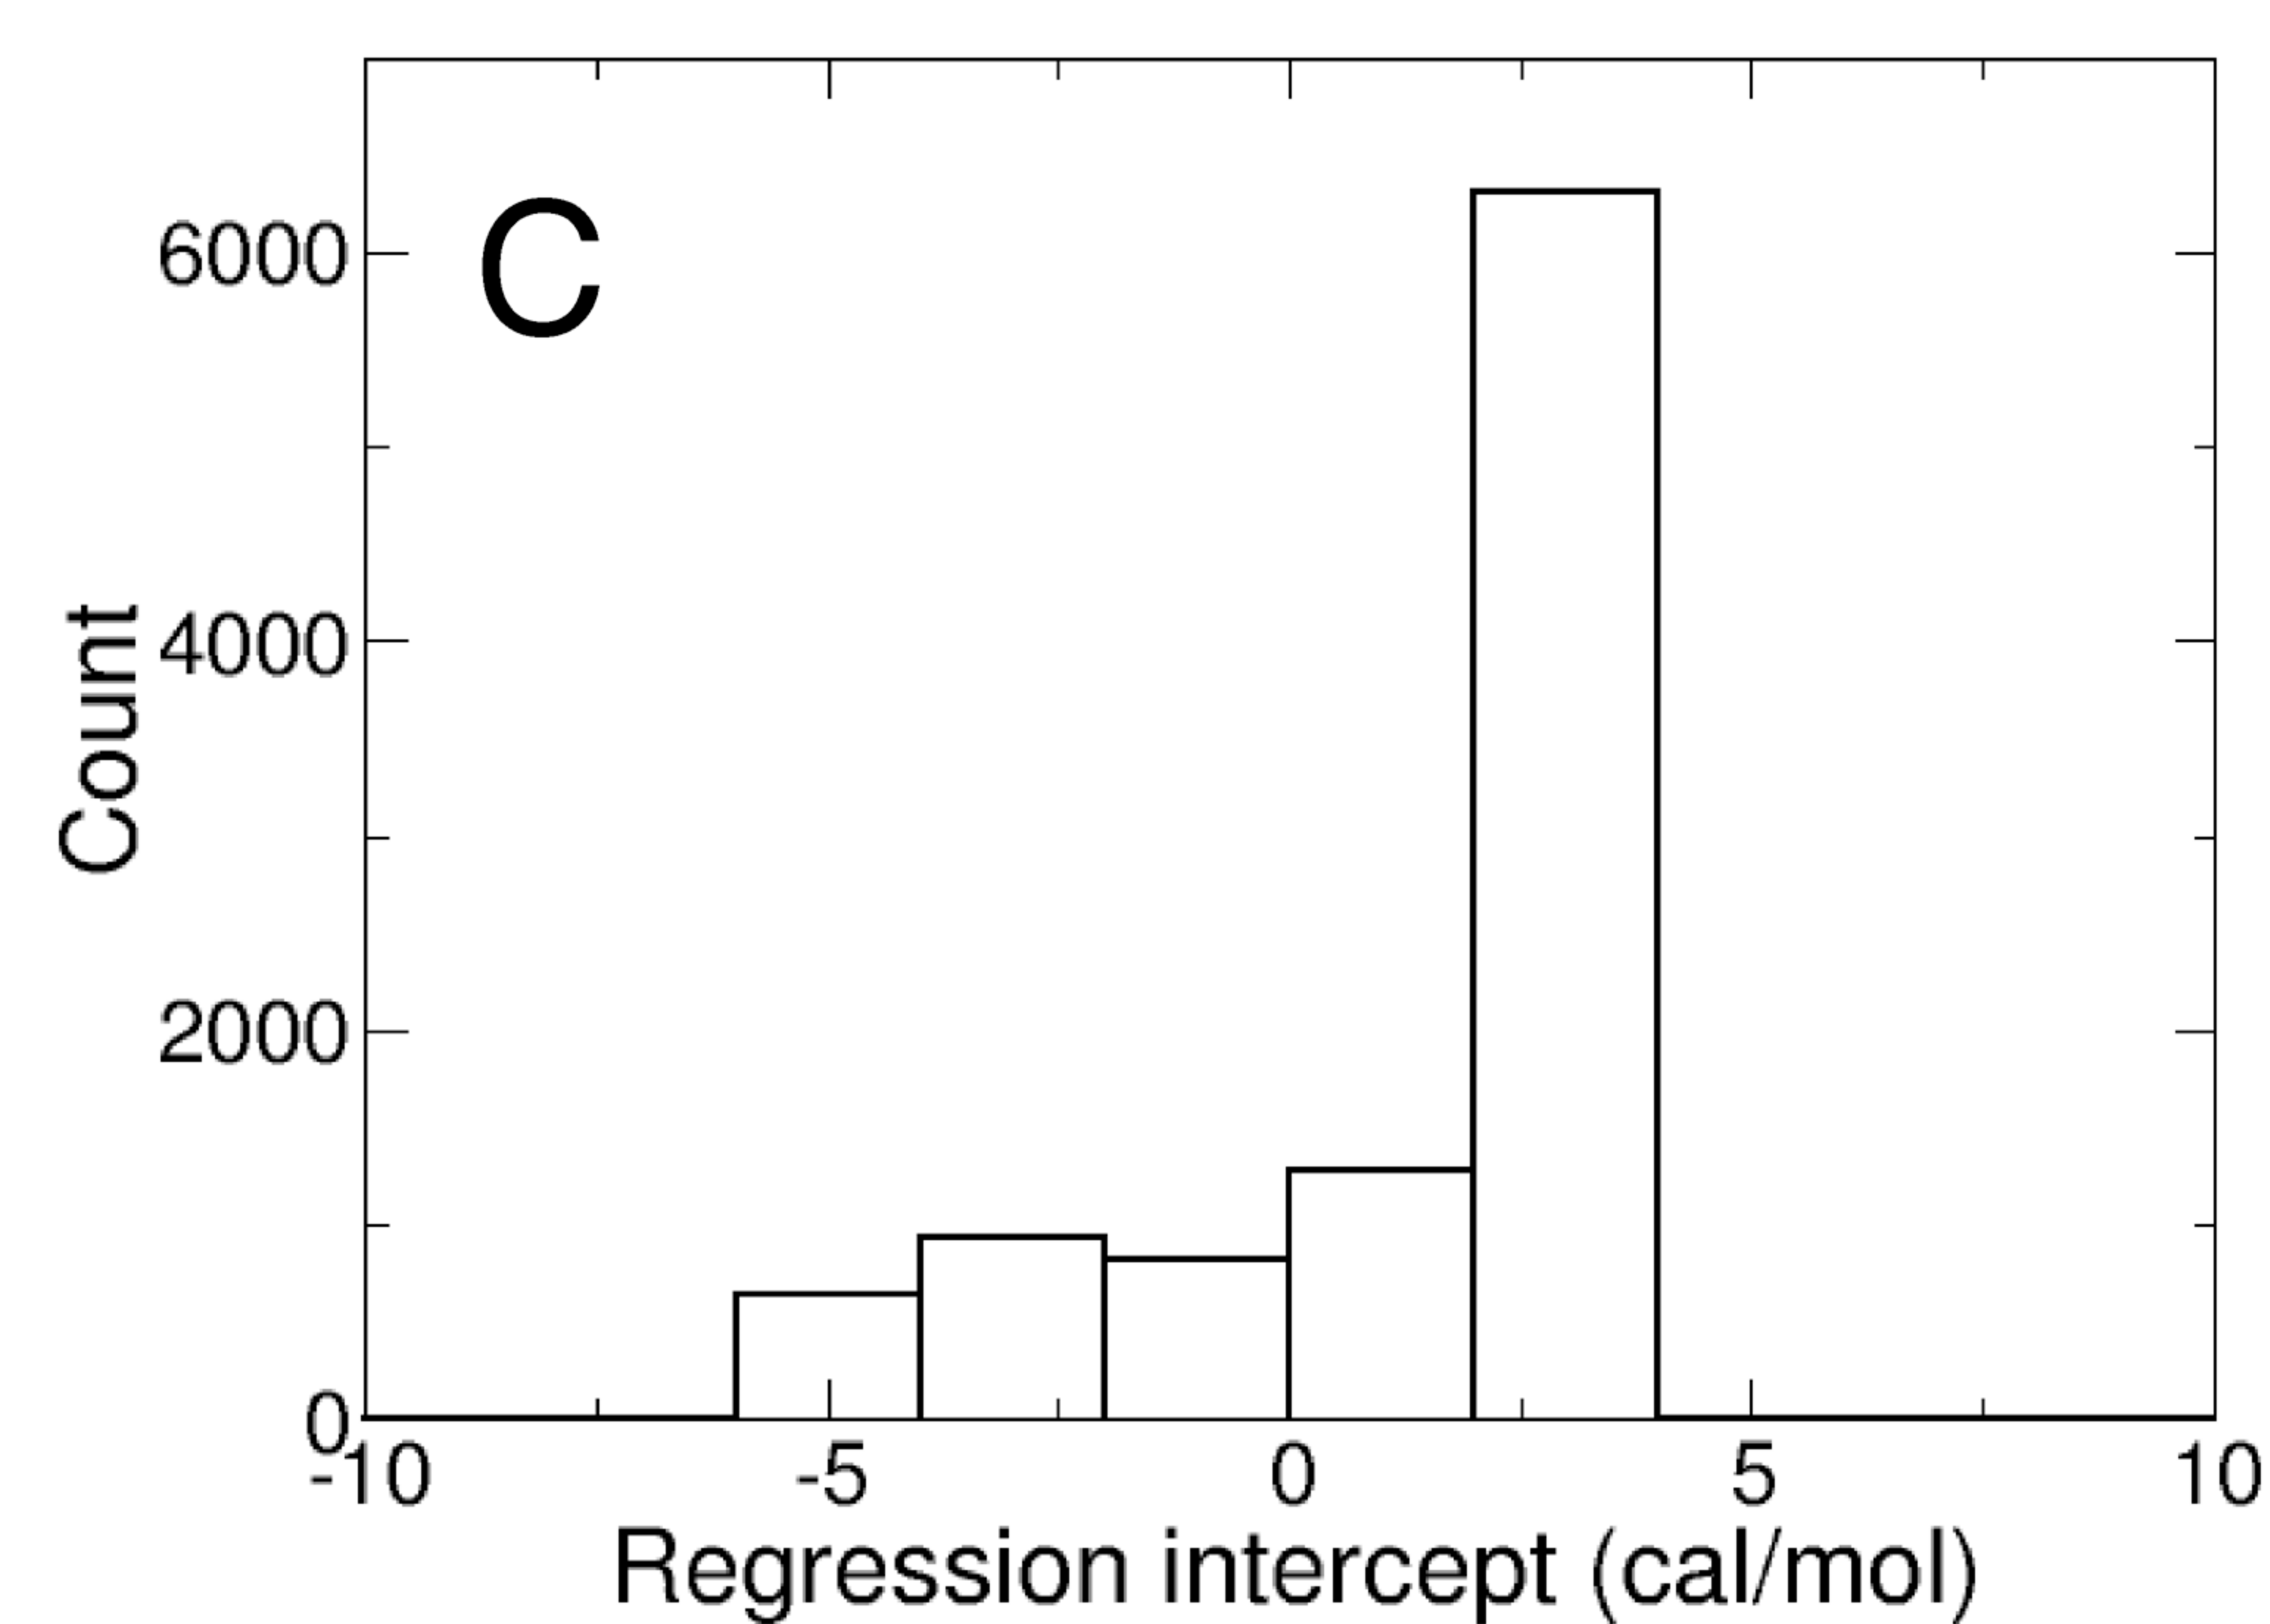

Supplement: pnas_0606236103_2.pdf [file pnas_0606236103_2.pdf]

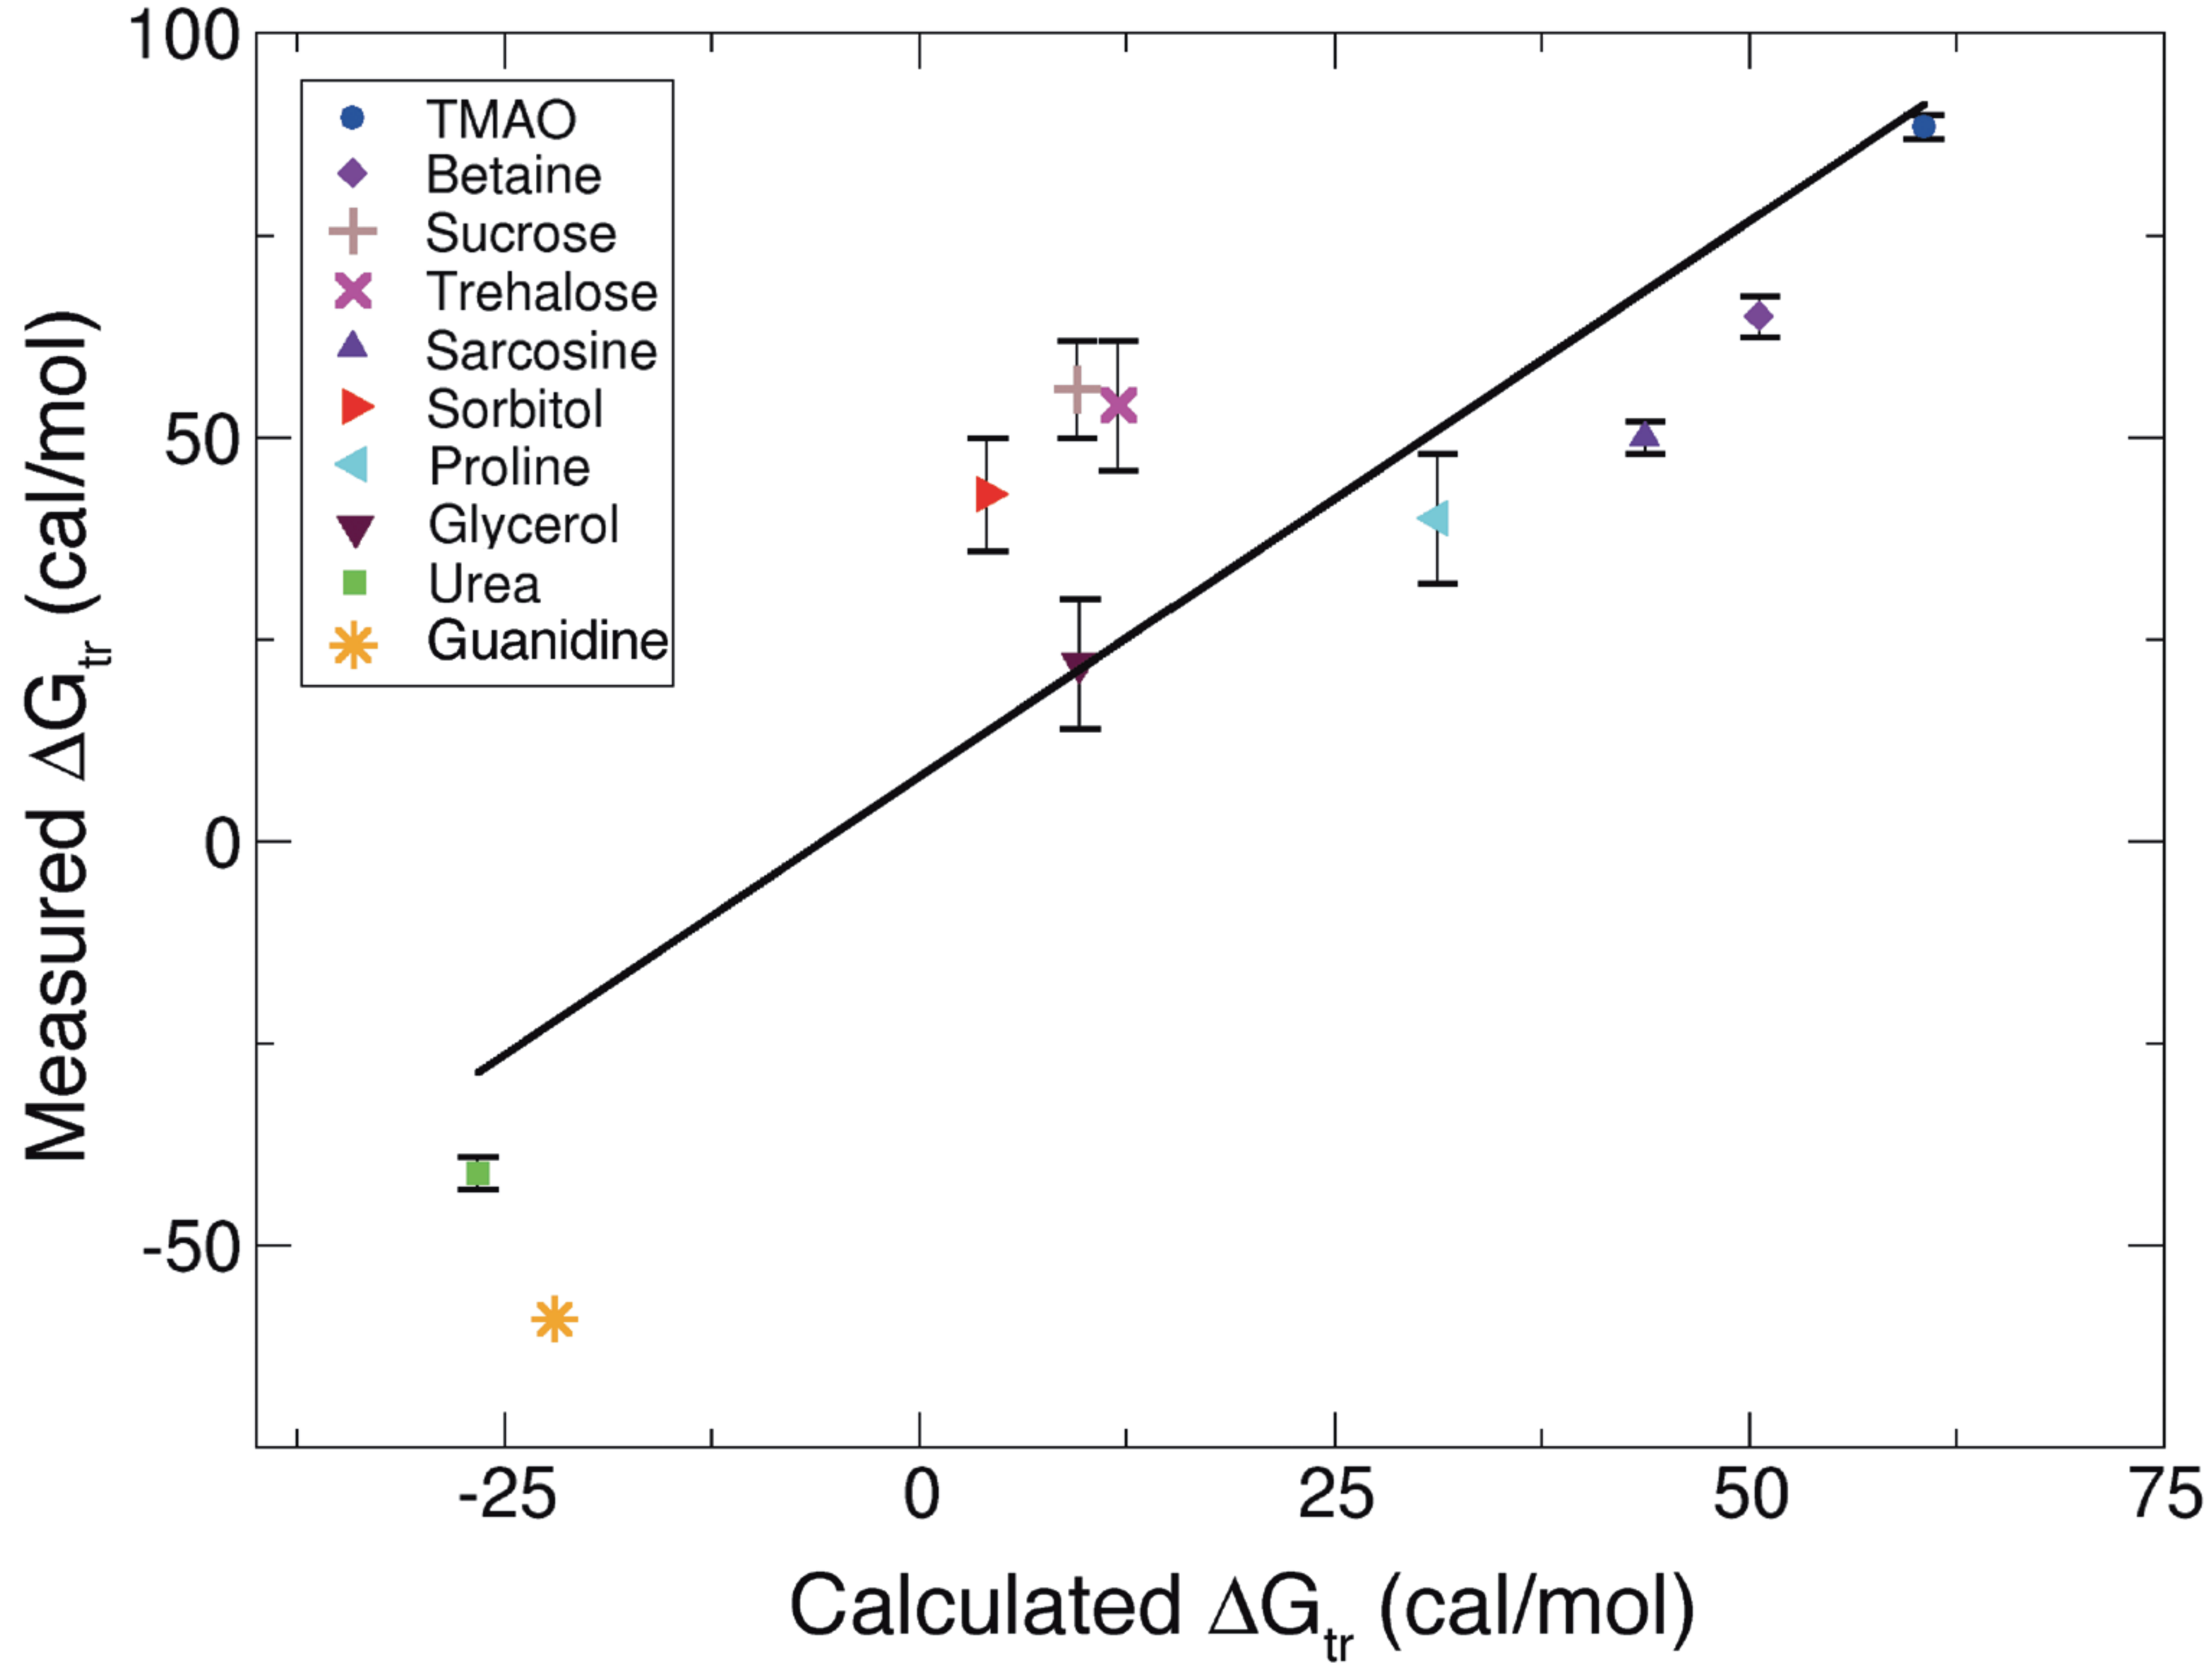

Supplement: pnas_0606236103_3.pdf [file pnas_0606236103_3.pdf]
